# Supplementary material for: Semi-Synthesis of N-Aryl Amide Analogs of Piperine from Piper nigrum and Evaluation of Their Antitrypanosomal, Antimalarial, and Anti-SARS-CoV-2 Main Protease Activities
Source: MDPI journal article supplement (doi:10.3390/molecules27092841), 2022-04-29
Supplement: s1 [file s1]

## Supplementary Materials

### Semi-Synthesis of *N*-Aryl Amide Analogs of Piperine from *Piper nigrum* and Evaluation of their Antitrypanosomal, Antimalarial, and Anti-SARS-CoV-2 Main Protease Activities

Rattanaorn Wansri <sup>1,2,3</sup>, Aye Chan Khine Lin <sup>1,2,3</sup>, Jutharat Pengon <sup>4</sup>, Sumalee Kamchonwongpaisan <sup>4</sup>, Nitipol Srimongkolpithak <sup>4</sup>, Roonglawan Rattanaajak <sup>4</sup>, Patcharin Wilasluck <sup>5,6</sup>, Peerapon Deetanya <sup>5,6</sup>, Kittikhun Wangkanont <sup>5,6</sup>, Kowit Hengphasatporn <sup>7</sup>, Yasuteru Shigeta <sup>7</sup>, Jatupol Liangsakul <sup>8</sup>, Aphinya Suroengrit <sup>9</sup>, Siwaporn Boonyasuppayakorn <sup>9</sup>, Taksina Chuanasa <sup>2</sup>, Wanchai De-eknamkul <sup>2</sup>, Supot Hannongbua <sup>9</sup>, Thanyada Rungrotmongkol <sup>10,11</sup>, Supakarn Chamni <sup>1,2,3,\*</sup>

- <sup>1</sup> Pharmaceutical Sciences and Technology Program, Faculty of Pharmaceutical Sciences, Chulalongkorn University, Bangkok 10330, Thailand
- <sup>2</sup> Department of Pharmacognosy and Pharmaceutical Botany, Faculty of Pharmaceutical Sciences, Chulalongkorn University, Bangkok 10330, Thailand
- <sup>3</sup> Natural Products and Nanoparticles Research Unit (NP<sup>2</sup>), Chulalongkorn University, Bangkok 10330, Thailand; supakarn.c@pharm.chula.ac.th
- <sup>4</sup> National Center for Genetic Engineering and Biotechnology (BIOTEC), National Science and Technology Development Agency, Pathum Thani 12120, Thailand; nitipol.sri@biotec.or.th
- <sup>5</sup> Center of Excellence for Molecular Biology and Genomics of Shrimp, Department of Biochemistry, Faculty of Science, Chulalongkorn University, Bangkok 10330, Thailand; Kittikhun.W@chula.ac.th
- <sup>6</sup> Molecular Crop Research Unit, Department of Biochemistry, Faculty of Science, Chulalongkorn University, Bangkok 10330, Thailand
- <sup>7</sup> Center for Computational Sciences, University of Tsukuba, 1-1-1 Tennodai, Tsukuba, Ibaraki 305-8577, Japan; shigeta@ccs.tsukuba.ac.jp
- <sup>8</sup> Scientific and Technological Research Equipment Centre Chulalongkorn University, Bangkok, 10330, Thailand; Jatu.P@chula.ac.th
- <sup>9</sup> Applied Medical Virology Research Unit, Department of Microbiology, Faculty of Medicine, Chulalongkorn University; siwaporn.b@chula.ac.th
- <sup>10</sup> Natural Product Biotechnology Research Unit, Chulalongkorn University, Bangkok 10330, Thailand; wanchai.d@chula.ac.th
- <sup>11</sup> Center of Excellence in Computational Chemistry (CECC), Department of Chemistry, Faculty of Science, Chulalongkorn University, Bangkok 10330, Thailand; supot.h@chula.ac.th
- <sup>12</sup> Center of Excellence in Biocatalyst and Sustainable Biotechnology, Department of Biochemistry, Faculty of Science, Chulalongkorn University, Bangkok 10330, Thailand; thanyada.r@chula.ac.th
- <sup>13</sup> Program in Bioinformatics and Computational Biology, Graduate School, Chulalongkorn University, Bangkok 10330, Thailand

\* Correspondence: supakarn.c@pharm.chula.ac.th; Tel.: +662-218-8357

| Content                                                                                                                                                                               | Page |
|---------------------------------------------------------------------------------------------------------------------------------------------------------------------------------------|------|
| <b>Table S1</b> Druglikeness, predict ADME parameters, and pharmacokinetic properties                                                                                                 | S3   |
| <b>Figure S1</b> RMSD analysis of piperine (1) and 2,5 dimethoxy substituted phenyl piperamide 5                                                                                      | S3   |
| <b>Table S2</b> <sup>1</sup> H and <sup>13</sup> C chemical shifts (δ in ppm, J in Hz) of piperine (1) and piperic acid (2) in acetone- <i>d</i> <sub>6</sub> (400 MHz)               | S4   |
| <b>Table S3</b> <sup>1</sup> H and <sup>13</sup> C chemical shifts (δ in ppm, J in Hz) of <i>N</i> -aryl amide derivative of piperine 3-5 in acetone- <i>d</i> <sub>6</sub> (400 MHz) | S5   |
| <b>Figure S2</b> <sup>1</sup> H-NMR spectrum of piperine (1) in acetone- <i>d</i> <sub>6</sub>                                                                                        | S6   |
| <b>Figure S3</b> <sup>13</sup> C-NMR spectrum of piperine (1) in acetone- <i>d</i> <sub>6</sub>                                                                                       | S6   |
| <b>Figure S4</b> COSY spectrum of piperine (1) in acetone- <i>d</i> <sub>6</sub>                                                                                                      | S7   |
| <b>Figure S5</b> IR spectrum of piperine (1), ATR                                                                                                                                     | S7   |
| <b>Figure S6</b> <sup>1</sup> H-NMR spectrum of piperic acid (2) in acetone- <i>d</i> <sub>6</sub>                                                                                    | S8   |
| <b>Figure S7</b> <sup>13</sup> C-NMR spectrum of piperic acid (2) in acetone- <i>d</i> <sub>6</sub>                                                                                   | S8   |
| <b>Figure S8</b> COSY spectrum of piperic acid (2) in acetone- <i>d</i> <sub>6</sub>                                                                                                  | S9   |
| <b>Figure S9</b> IR spectrum of piperic acid (2), ATR                                                                                                                                 | S9   |
| <b>Figure S10</b> <sup>1</sup> H-NMR spectrum of compound 3 in acetone- <i>d</i> <sub>6</sub>                                                                                         | S10  |
| <b>Figure S11</b> <sup>13</sup> C-NMR spectrum of compound 3 in acetone- <i>d</i> <sub>6</sub>                                                                                        | S10  |
| <b>Figure S12</b> COSY spectrum of compound 3 in acetone- <i>d</i> <sub>6</sub>                                                                                                       | S11  |
| <b>Figure S13</b> HSQC spectrum of compound 3 in acetone- <i>d</i> <sub>6</sub>                                                                                                       | S11  |
| <b>Figure S14</b> HMBC spectrum of compound 3 in acetone- <i>d</i> <sub>6</sub>                                                                                                       | S12  |
| <b>Figure S15</b> IR spectrum of compound 3, ATR                                                                                                                                      | S12  |
| <b>Figure S16</b> <sup>1</sup> H-NMR spectrum of compound 4 in acetone- <i>d</i> <sub>6</sub>                                                                                         | S13  |
| <b>Figure S17</b> <sup>13</sup> C-NMR spectrum of compound 4 in acetone- <i>d</i> <sub>6</sub>                                                                                        | S13  |
| <b>Figure S18</b> COSY spectrum of compound 4 in acetone- <i>d</i> <sub>6</sub>                                                                                                       | S14  |
| <b>Figure S19</b> HSQC spectrum of compound 4 in acetone- <i>d</i> <sub>6</sub>                                                                                                       | S14  |
| <b>Figure S20</b> HMBC spectrum of compound 4 in acetone- <i>d</i> <sub>6</sub>                                                                                                       | S15  |
| <b>Figure S21</b> IR spectrum of compound 4, ATR                                                                                                                                      | S15  |
| <b>Figure S22</b> <sup>1</sup> H-NMR spectrum of compound 5 in acetone- <i>d</i> <sub>6</sub>                                                                                         | S16  |
| <b>Figure S23</b> <sup>13</sup> C-NMR spectrum of compound 5 in acetone- <i>d</i> <sub>6</sub>                                                                                        | S16  |
| <b>Figure S24</b> COSY spectrum of compound 5 in acetone- <i>d</i> <sub>6</sub>                                                                                                       | S17  |
| <b>Figure S25</b> HSQC spectrum of compound 5 in acetone- <i>d</i> <sub>6</sub>                                                                                                       | S17  |
| <b>Figure S26</b> HMBC spectrum of compound 5 in acetone- <i>d</i> <sub>6</sub>                                                                                                       | S18  |
| <b>Figure S27</b> IR spectrum of compound 5, ATR                                                                                                                                      | S18  |

**Table S1.** Drug-likeness, predict ADME parameters, and pharmacokinetic properties (www.swissadme.ch)

|                                     | 1                                               | 2                                              | 3                                               | 4                                               | 5                                               |
|-------------------------------------|-------------------------------------------------|------------------------------------------------|-------------------------------------------------|-------------------------------------------------|-------------------------------------------------|
|                                     |                                                 |                                                |                                                 |                                                 |                                                 |
| Properties                          | Compounds                                       |                                                |                                                 |                                                 |                                                 |
|                                     | Piperine (1)                                    | Piperic acid (2)                               | 3                                               | 4                                               | 5                                               |
| Formula                             | C <sub>17</sub> H <sub>19</sub> NO <sub>3</sub> | C <sub>12</sub> H <sub>10</sub> O <sub>4</sub> | C <sub>18</sub> H <sub>15</sub> NO <sub>3</sub> | C <sub>20</sub> H <sub>19</sub> NO <sub>5</sub> | C <sub>20</sub> H <sub>19</sub> NO <sub>5</sub> |
| Molecular weight                    | 285.34 g/mol                                    | 218.21 g/mol                                   | 293.32 g/mol                                    | 353.37 g/mol                                    | 353.37 g/mol                                    |
| H-bond acceptors                    | 3                                               | 4                                              | 3                                               | 5                                               | 5                                               |
| H-bond donors                       | 0                                               | 1                                              | 1                                               | 1                                               | 1                                               |
| Lipophilicity                       | 3.38                                            | 2.20                                           | 3.00                                            | 3.82                                            | 3.71                                            |
| Log <i>P</i> <sub>o/w</sub> (iLOGP) | -3.96                                           | -4.07                                          | -5.26                                           | -4.65                                           | -4.65                                           |
| Water Solubility                    | -3.96                                           | -4.07                                          | -5.26                                           | -4.65                                           | -4.65                                           |
| Log <i>S</i> (Ali)                  | 0.111 mmol/l                                    | 0.084 mmol/l                                   | 0.005 mmol/l                                    | 0.008 mmol/l                                    | 0.002 mmol/l                                    |
| Bioavailability Score               | 0.55                                            | 0.85                                           | 0.55                                            | 0.55                                            | 0.55                                            |

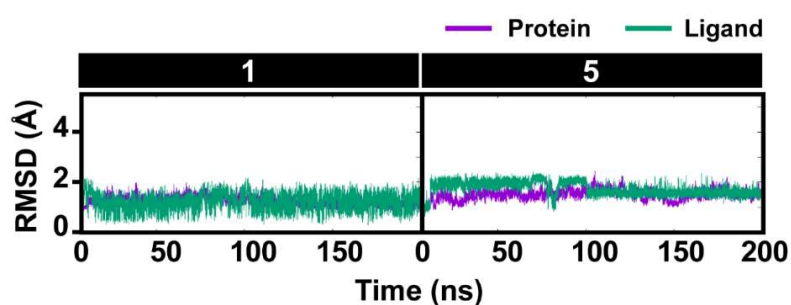

**Figure S1.** RMSD analysis of piperine (1) and 2,5 dimethoxy substituted phenyl piperamide 5

**Table S2.**  $^1\text{H}$  and  $^{13}\text{C}$  chemical shifts ( $\delta$  in ppm,  $J$  in Hz) of piperine (1) and piperic acid (2) in acetone,  $d_6$  (400 MHz)

| Carbon No. | 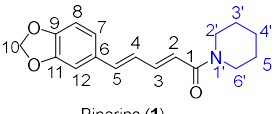<br>Piperine (1) |                     | <br>Piperic acid (2) |                     |
|------------|---------------------------------------------------------------------------------------------------|---------------------|---------------------------------------------------------------------------------------------------------|---------------------|
|            | $^1\text{H}$ NMR                                                                                  | $^{13}\text{C}$ NMR | $^1\text{H}$ NMR                                                                                        | $^{13}\text{C}$ NMR |
| 1          | -                                                                                                 | 165.3               | -                                                                                                       | 167.9               |
| 2          | 6.65 (d, $J$ = 14.4 Hz, 1H)                                                                       | 121.9               | 6.00 (d, $J$ = 15.2 Hz, 1H)                                                                             | 121.4               |
| 3          | 7.31 (dd, $J$ = 10.4 and 14.4 Hz, 1H)                                                             | 142.6               | 7.40 (m, 1H)                                                                                            | 146.1               |
| 4          | 6.93 (d, $J$ = 10.8 Hz, 1H)                                                                       | 126.7               | 6.98 (d, $J$ = 10.0 Hz, 1H)                                                                             | 125.7               |
| 5          | 6.85 (d, $J$ = 8.0 Hz, 1H)                                                                        | 138.9               | 6.97 (d, $J$ = 5.6 Hz, 1H)                                                                              | 141.0               |
| 6          | -                                                                                                 | 131.7               | -                                                                                                       | 131.9               |
| 7          | 6.99 (dd, $J$ = 1.6 and 8.0 Hz, 1H)                                                               | 123.4               | 7.03 (dd, $J$ = 1.6 and 8.0 Hz, 1H)                                                                     | 124.0               |
| 8          | 6.98 (d, $J$ = 8.0 Hz, 1H)                                                                        | 109.3               | 6.86 (d, $J$ = 8.0 Hz, 1H)                                                                              | 109.3               |
| 9          | -                                                                                                 | 149.1               | -                                                                                                       | 149.5               |
| 10         | 6.02 (s, 2H)                                                                                      | 102.3               | 6.04 (s, 2H)                                                                                            | 102.5               |
| 11         | -                                                                                                 | 149.3               | -                                                                                                       | 149.6               |
| 12         | 7.11 (d, $J$ = 1.6 Hz, 1H)                                                                        | 106.4               | 7.17 (d, $J$ = 1.6 Hz, 1H)                                                                              | 106.6               |
| 1'         | -                                                                                                 | -                   | -                                                                                                       | -                   |
| 2'         | 3.57 (t, $J$ = 5.4 Hz, 2H)                                                                        | 46.4                | -                                                                                                       | -                   |
| 3'         | 1.53 (m, 2H)                                                                                      | 27.6                | -                                                                                                       | -                   |
| 4'         | 1.64 (m, 2H)                                                                                      | 25.5                | -                                                                                                       | -                   |
| 5'         | 1.53 (m, 2H)                                                                                      | 26.6                | -                                                                                                       | -                   |
| 6'         | 3.57 (t, $J$ = 5.4 Hz, 2H)                                                                        | 43.5                | -                                                                                                       | -                   |

**Table S3.**  $^1\text{H}$  and  $^{13}\text{C}$  chemical shifts ( $\delta$  in ppm,  $J$  in Hz) of *N*-aryl amide derivative of piperine **3-5** in acetone,  $d_6$  (400 mHz)

| Carbon                                                                              |                                              |                     |                                                 |       |                                              |                                                                                    |                                              |                     |
|-------------------------------------------------------------------------------------|----------------------------------------------|---------------------|-------------------------------------------------|-------|----------------------------------------------|------------------------------------------------------------------------------------|----------------------------------------------|---------------------|
| 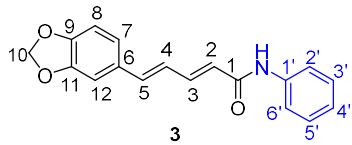   |                                              |                     |                                                 |       |                                              |  |                                              |                     |
|  |                                              |                     |                                                 |       |                                              |                                                                                    |                                              |                     |
| No. <sup>1</sup> H NMR                                                              |                                              | <sup>13</sup> C NMR | <sup>1</sup> H NMR                              |       | <sup>13</sup> C NMR                          | <sup>1</sup> H NMR                                                                 |                                              | <sup>13</sup> C NMR |
| 1                                                                                   | -                                            | 164.9               | -                                               | 164.4 | -                                            | 164.8                                                                              | -                                            | 164.8               |
| 2                                                                                   | 6.31 (d, <i>J</i> = 14.8 Hz, 1H)             | 125.3               | 6.46 (d, <i>J</i> = 14.8 Hz, 1H)                | 125.8 | 6.49 (d, <i>J</i> = 14.8 Hz, 1H)             | 125.5                                                                              | 6.49 (d, <i>J</i> = 14.8 Hz, 1H)             | 125.5               |
| 3                                                                                   | 7.43 (ddd, <i>J</i> = 3.6, 7.2, 15.2 Hz, 1H) | 142.3               | 7.40 (ddd, <i>J</i> = 4.6, 6.0 and 14.8 Hz, 1H) | 141.7 | 7.42 (ddd, <i>J</i> = 2.4, 8.0, 14.8 Hz, 1H) | 142.4                                                                              | 7.42 (ddd, <i>J</i> = 2.4, 8.0, 14.8 Hz, 1H) | 142.4               |
| 4                                                                                   | 6.94 (d, <i>J</i> = 6.8 Hz, 1H)              | 126.0               | 6.93 (d, <i>J</i> = 6.0 Hz, 1H)                 | 126.1 | 6.95 (d, <i>J</i> = 7.2 Hz, 1H)              | 139.9                                                                              | 6.95 (d, <i>J</i> = 7.2 Hz, 1H)              | 139.9               |
| 5                                                                                   | 6.93 (d, <i>J</i> = 3.6 Hz, 1H)              | 139.8               | 6.92 (d, <i>J</i> = 4.4 Hz, 1H)                 | 139.4 | 6.94 (d, <i>J</i> = 8.8 Hz, 1H)              | 126.0                                                                              | 6.94 (d, <i>J</i> = 8.8 Hz, 1H)              | 126.0               |
| 6                                                                                   | -                                            | 132.1               | -                                               | 132.2 | -                                            | 132.1                                                                              | -                                            | 132.1               |
| 7                                                                                   | 7.02 (dd, <i>J</i> = 1.6 and 8.0 Hz, 1H)     | 123.7               | 7.02 (dd, <i>J</i> = 1.6 and 8.0 Hz, 1H)        | 123.6 | 7.02 (dd, <i>J</i> = 1.4 and 8.2 Hz, 1H)     | 123.7                                                                              | 7.02 (dd, <i>J</i> = 1.4 and 8.2 Hz, 1H)     | 123.7               |
| 8                                                                                   | 6.85 (d, <i>J</i> = 8.0 Hz, 1H)              | 109.3               | 6.85 (d, <i>J</i> = 8.0 Hz, 1H)                 | 109.3 | 6.85 (d, <i>J</i> = 8.0 Hz, 1H)              | 109.3                                                                              | 6.85 (d, <i>J</i> = 8.0 Hz, 1H)              | 109.3               |
| 9                                                                                   | -                                            | 149.4               | -                                               | 149.3 | -                                            | 149.4                                                                              | -                                            | 149.4               |
| 10                                                                                  | 6.03 (s, 2H)                                 | 102.5               | 6.03 (s, 2H)                                    | 102.5 | 6.04 (s, 2H)                                 | 102.5                                                                              | 6.04 (s, 2H)                                 | 102.5               |
| 11                                                                                  | -                                            | 149.4               | -                                               | 149.3 | -                                            | 149.4                                                                              | -                                            | 149.4               |
| 12                                                                                  | 7.15 (d, <i>J</i> = 1.6 Hz, 1H)              | 106.5               | 7.14 (d, <i>J</i> = 2.0 Hz, 1H)                 | 106.5 | 7.15 (d, <i>J</i> = 1.2 Hz, 1H)              | 106.5                                                                              | 7.15 (d, <i>J</i> = 1.2 Hz, 1H)              | 106.5               |
| NH                                                                                  | 9.30 (br s, 1H)                              | -                   | 8.46 (br s, 1H)                                 | -     | 8.62 (br s, 1H)                              | -                                                                                  | 8.62 (br s, 1H)                              | -                   |
| 1'                                                                                  | -                                            | 140.7               | -                                               | 142.8 | -                                            | 143.8                                                                              | -                                            | 143.8               |
| 2'                                                                                  | 7.74 (dd, <i>J</i> = 1.2, 8.8 Hz, 2H)        | 120.2               | -                                               | 151.0 | -                                            | 130.2                                                                              | -                                            | 130.2               |
| 3'                                                                                  | 7.30 (dd, <i>J</i> = 7.6, 8.8 Hz, 2H)        | 129.6               | 6.59 (d, <i>J</i> = 2.8 Hz, 1H)                 | 99.4  | 6.58 (dd, <i>J</i> = 2.8 and 8.8 Hz, 1H)     | 108.3                                                                              | 6.58 (dd, <i>J</i> = 2.8 and 8.8 Hz, 1H)     | 108.3               |
| 4'                                                                                  | 7.05 (m, 1H)                                 | 124.2               | -                                               | 157.6 | 6.92 (d, <i>J</i> = 8.0 Hz, 1H)              | 112.0                                                                              | 6.92 (d, <i>J</i> = 8.0 Hz, 1H)              | 112.0               |
| 5'                                                                                  | 7.30 (dd, <i>J</i> = 7.6, 8.8 Hz, 2H)        | 129.6               | 6.50 (dd, <i>J</i> = 2.8 and 8.8 Hz, 1H)        | 104.8 | -                                            | 154.8                                                                              | -                                            | 154.8               |
| 6'                                                                                  | 7.74 (dd, <i>J</i> = 1.2, 8.8 Hz, 2H)        | 120.2               | 8.30 (d, <i>J</i> = 8.8 Hz, 1H)                 | 122.2 | 8.23 (d, <i>J</i> = 2.8 Hz, 1H)              | 107.9                                                                              | 8.23 (d, <i>J</i> = 2.8 Hz, 1H)              | 107.9               |
| 2'-OMe                                                                              | -                                            | -                   | 3.86 (s, 3H)                                    | 56.3  | 3.83 (s, 3H)                                 | 56.8                                                                               | 3.83 (s, 3H)                                 | 56.8                |
| 4'-OMe                                                                              | -                                            | -                   | 3.78 (s, 3H)                                    | 55.8  | -                                            | -                                                                                  | -                                            | -                   |
| 5'-OMe                                                                              | -                                            | -                   | -                                               | -     | 3.74 (s, 3H)                                 | 55.9                                                                               | 3.74 (s, 3H)                                 | 55.9                |

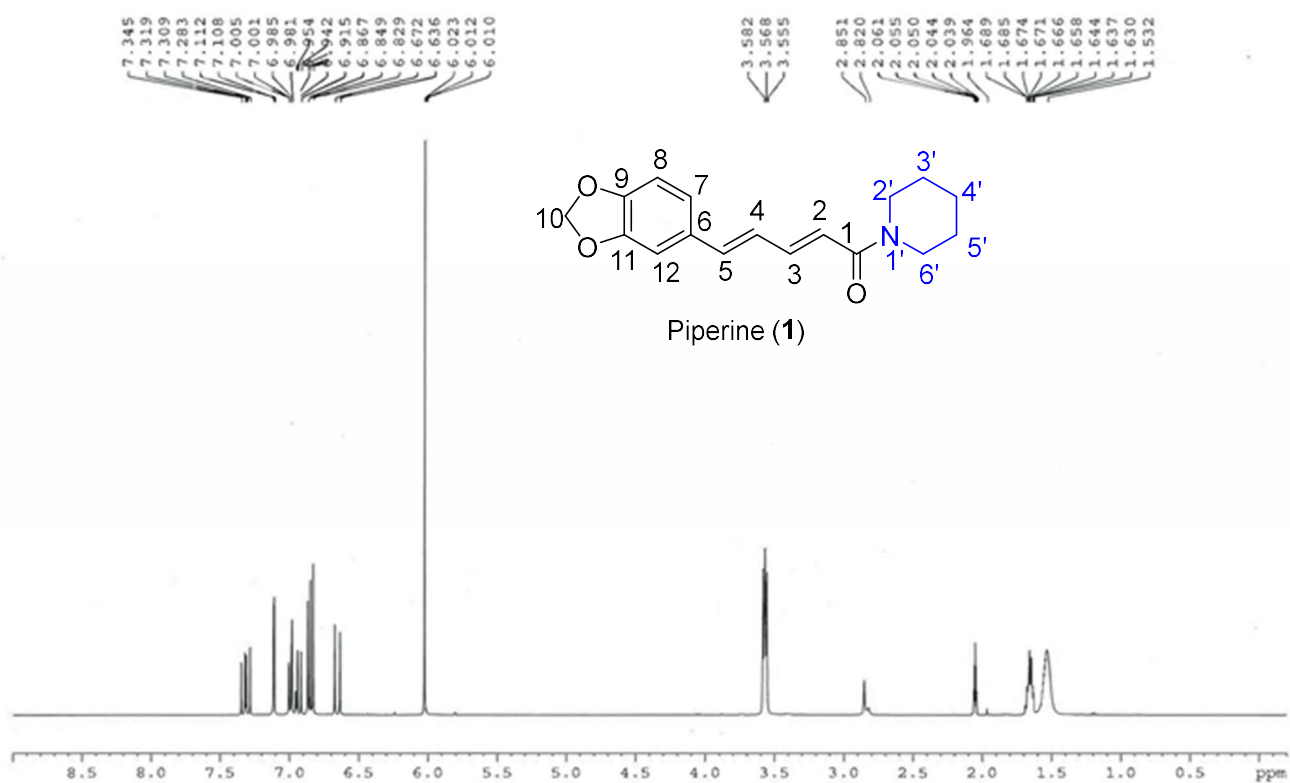

Figure S2.  $^1\text{H}$ -NMR spectrum of piperine (1) in acetone- $d_6$

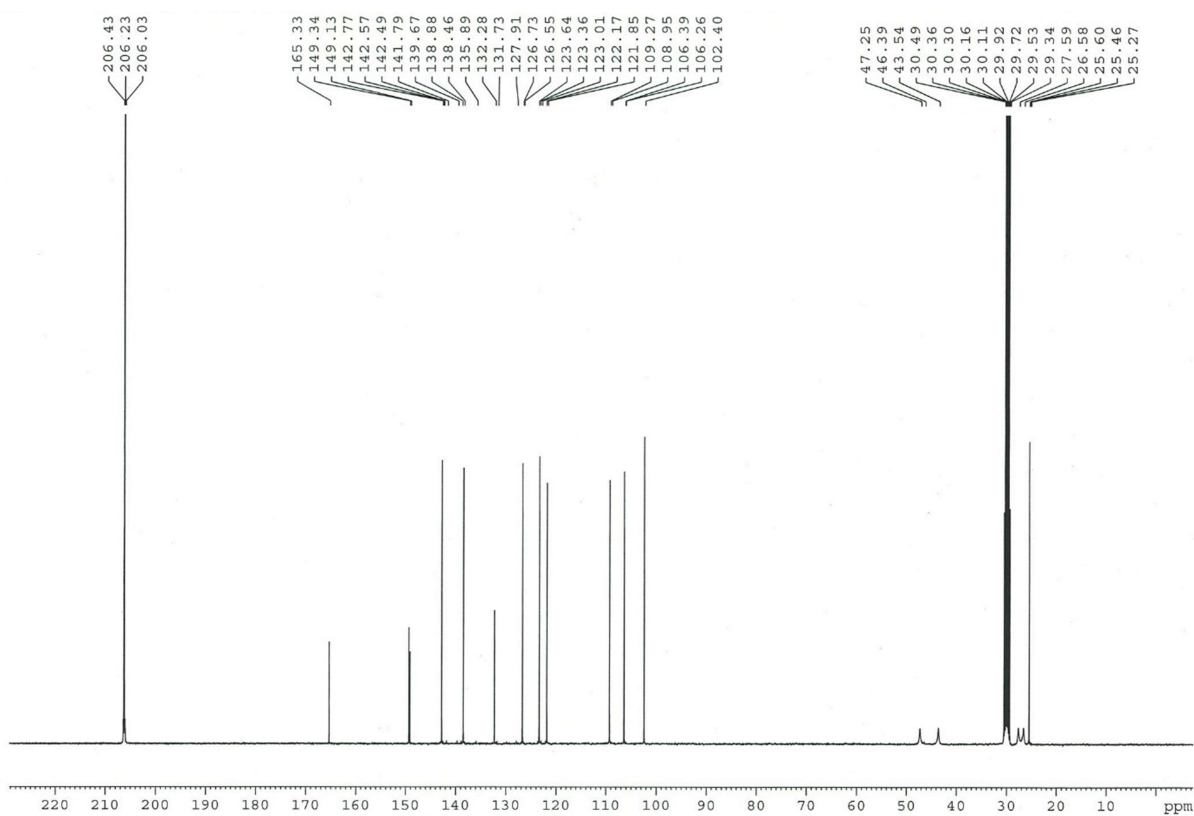

Figure S3.  $^{13}\text{C}$ -NMR spectrum of piperine (1) in acetone- $d_6$

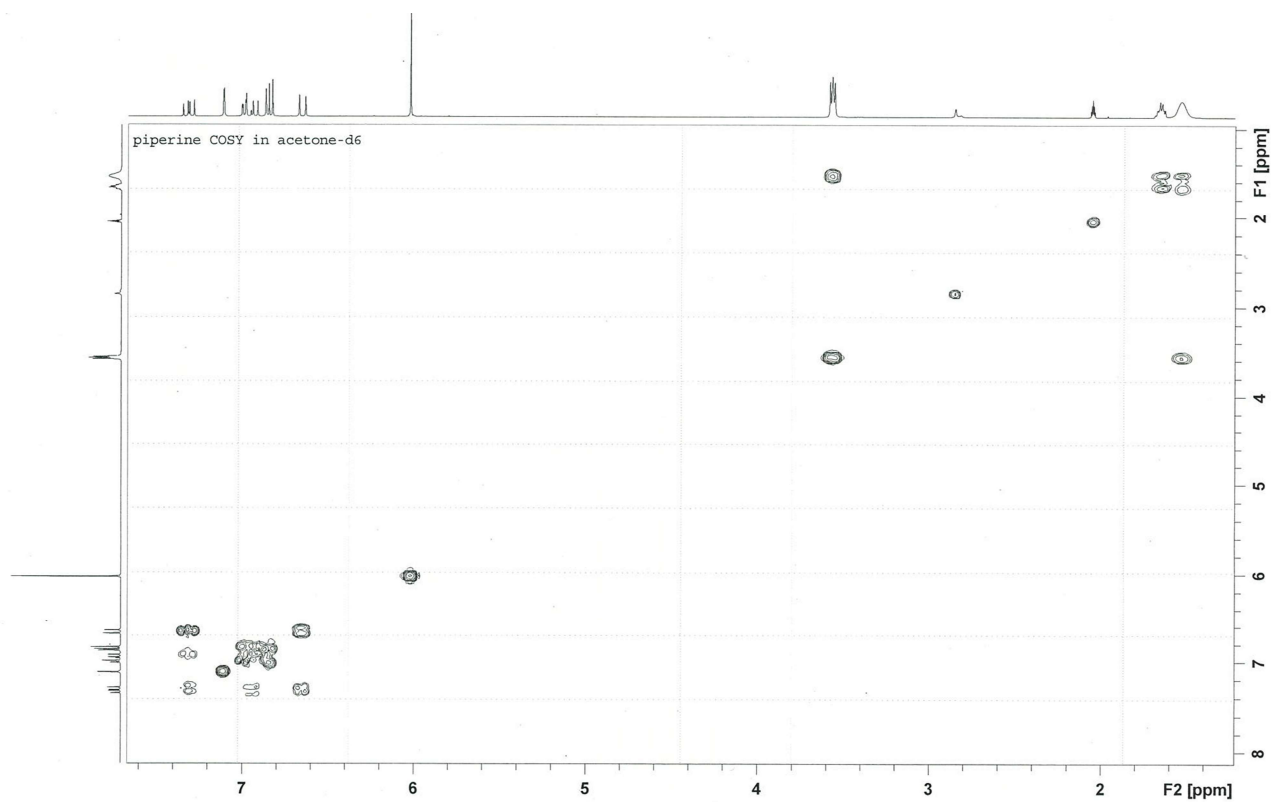

Figure S4. COSY spectrum of piperine (1) in acetone-*d*<sub>6</sub>

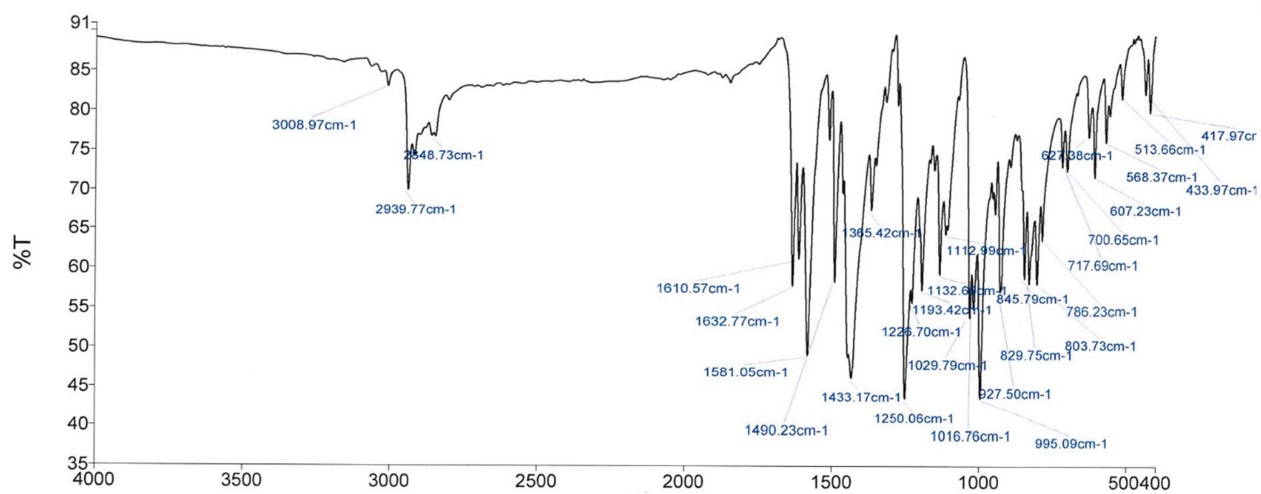

Figure S5. IR spectrum of piperine (1), ATR

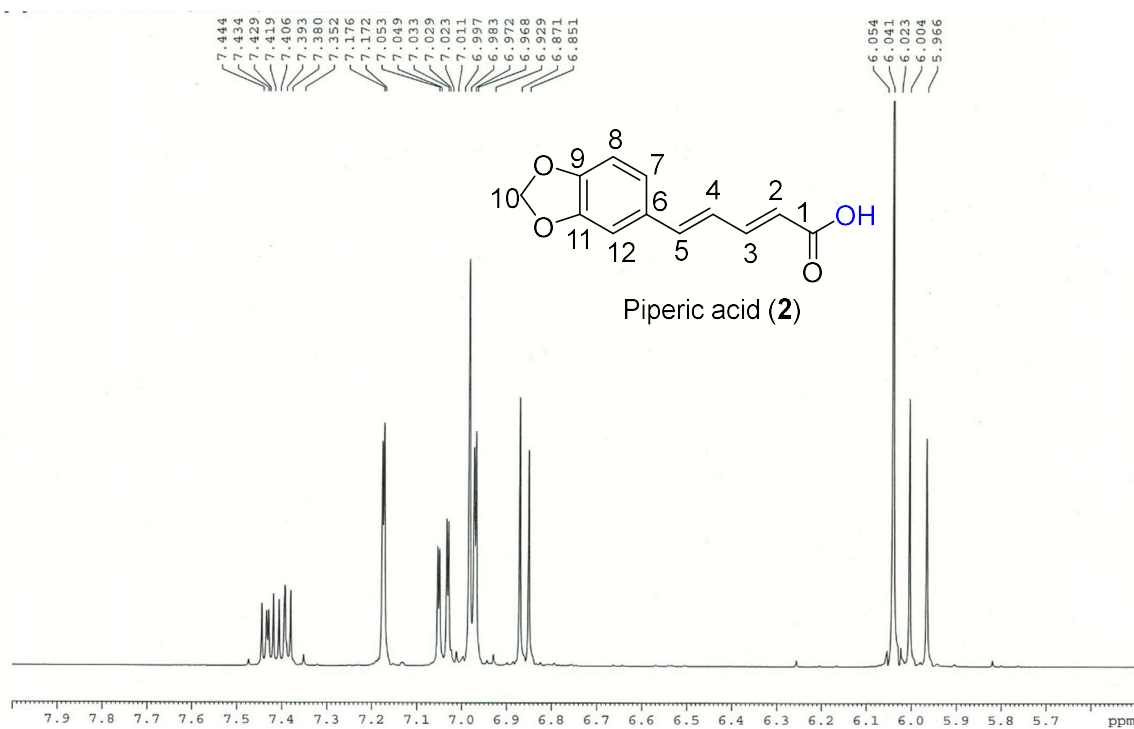

Figure S6. <sup>1</sup>H-NMR spectrum of piperic acid (2) in acetone-*d*<sub>6</sub>

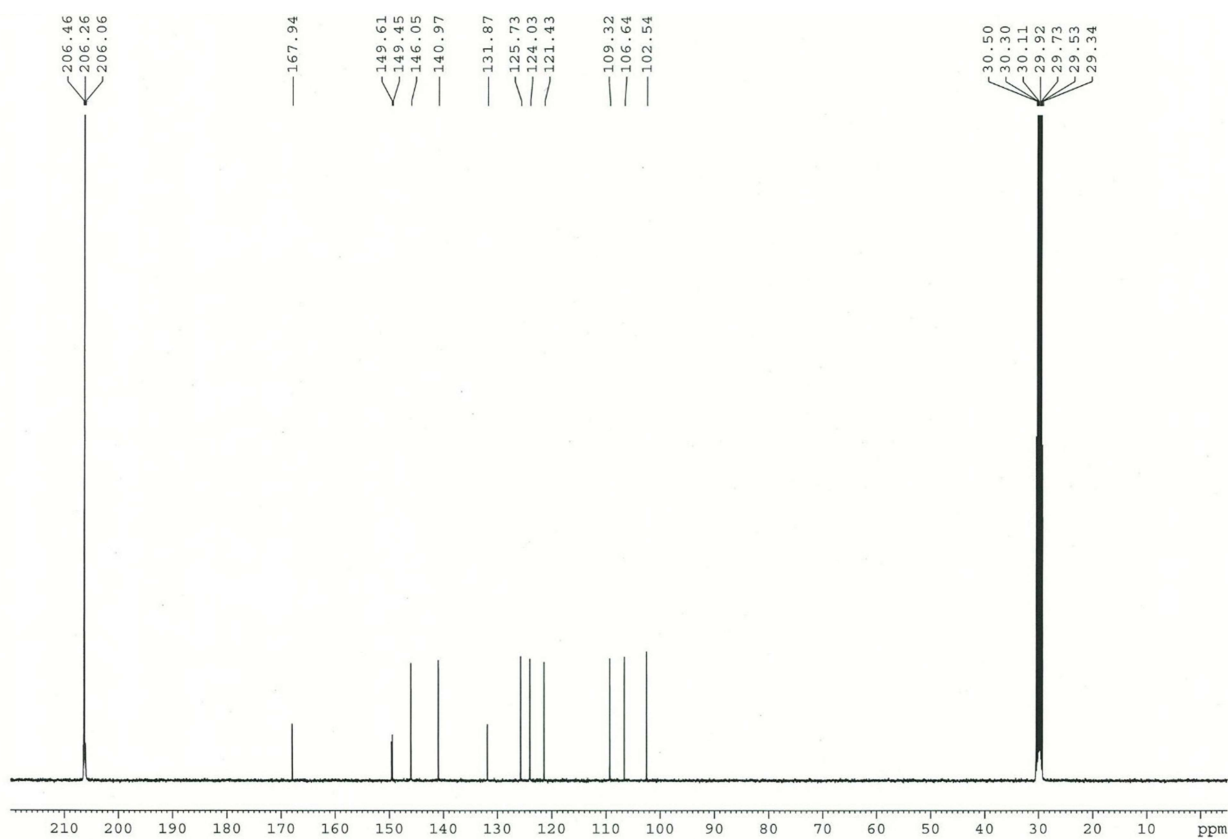

Figure S7. <sup>13</sup>C-NMR spectrum of piperic acid (2) in acetone-*d*<sub>6</sub>



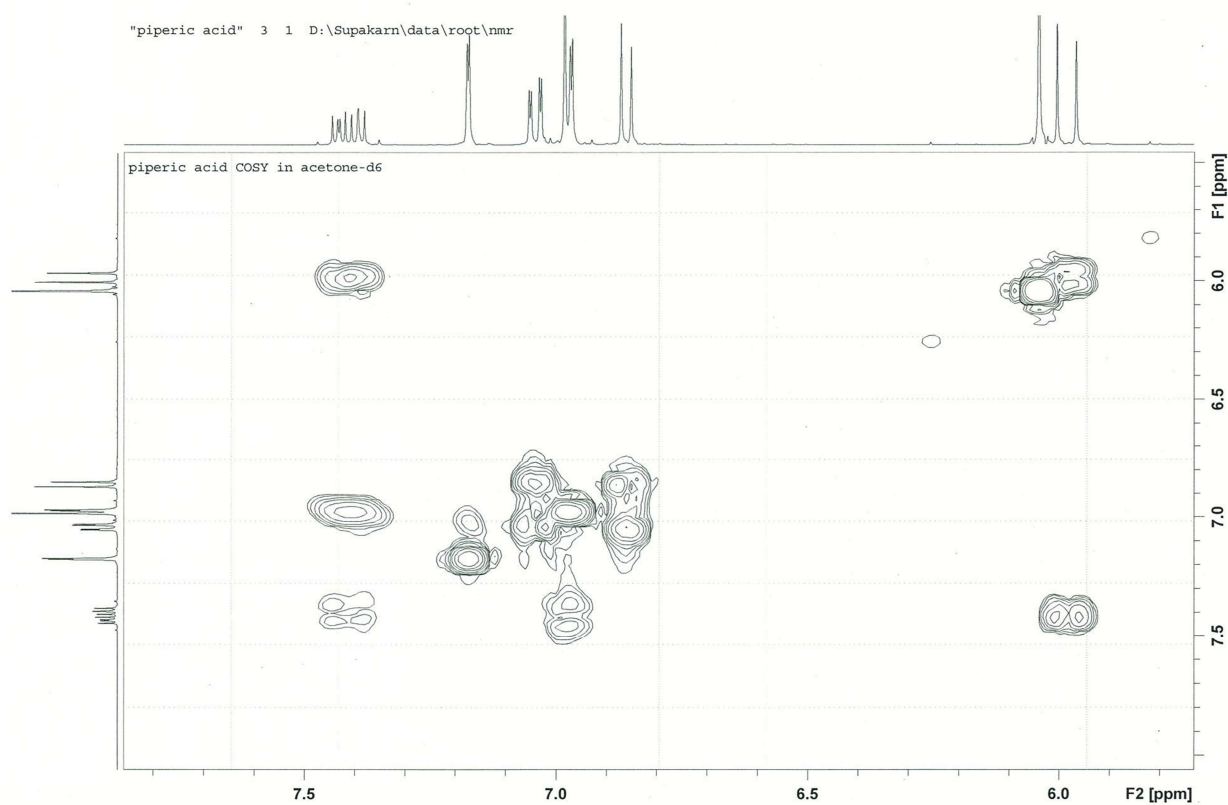

Figure S8. COSY spectrum of piperic acid (2) in acetone- $d_6$

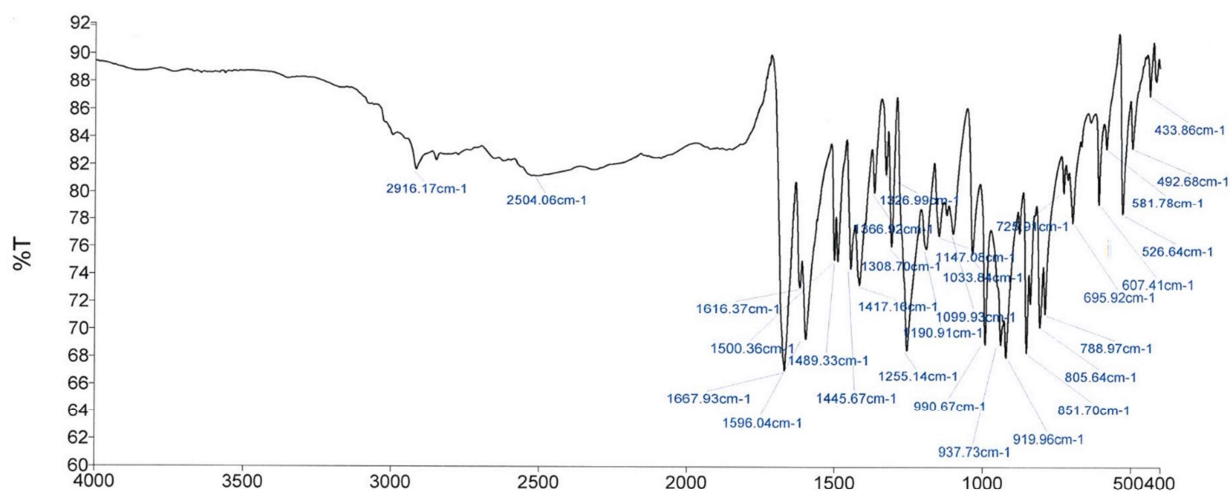

Figure S9. IR spectrum of piperic acid (2), ATR

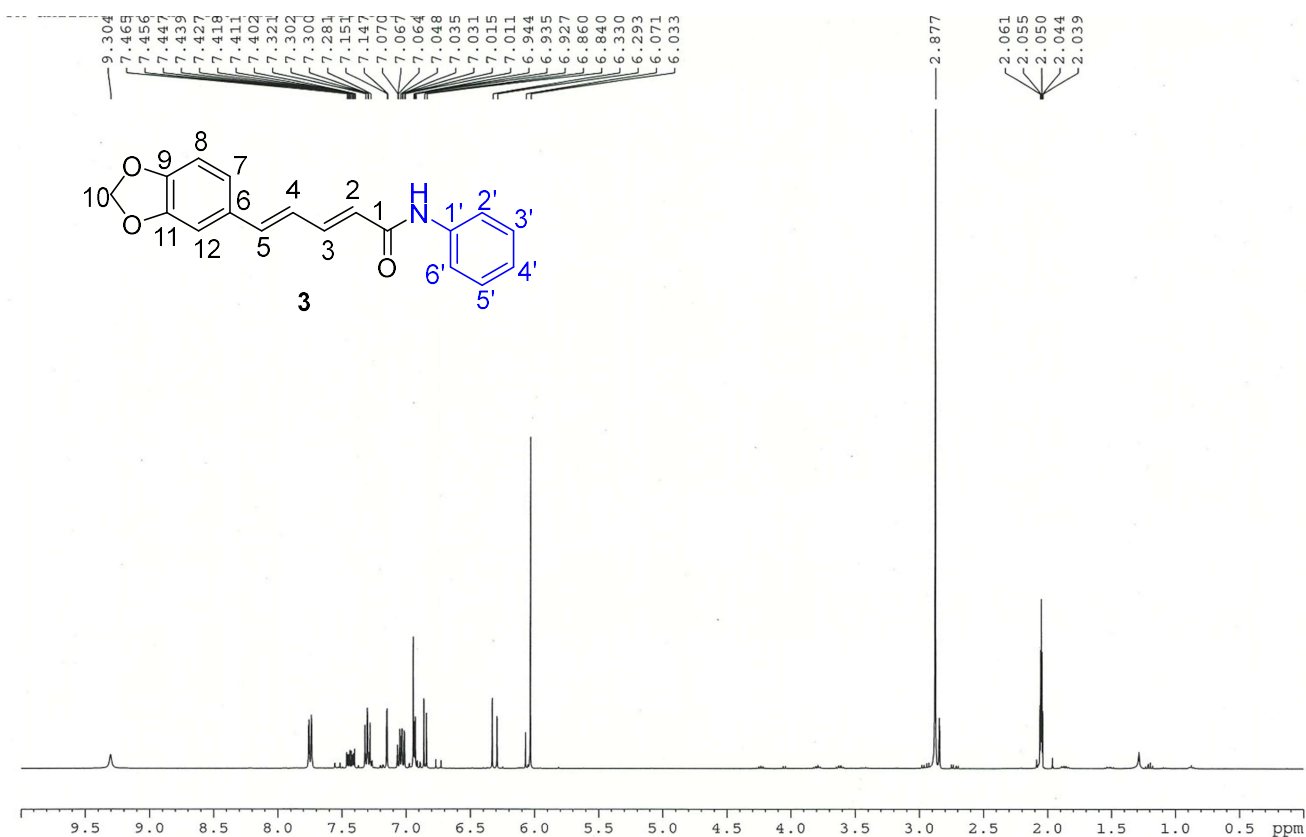

Figure S10. <sup>1</sup>H-NMR spectrum of compound 3 in acetone-*d*<sub>6</sub>

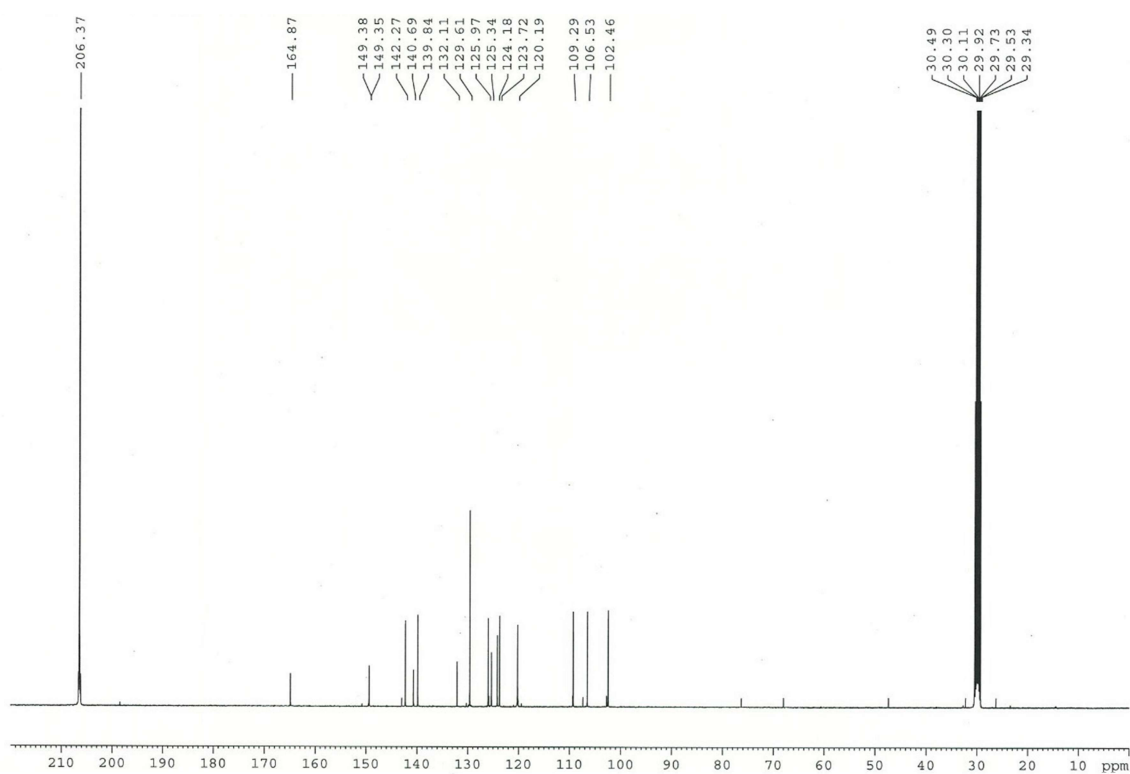

Figure S11. <sup>13</sup>C-NMR spectrum of compound 3 in acetone-*d*<sub>6</sub>

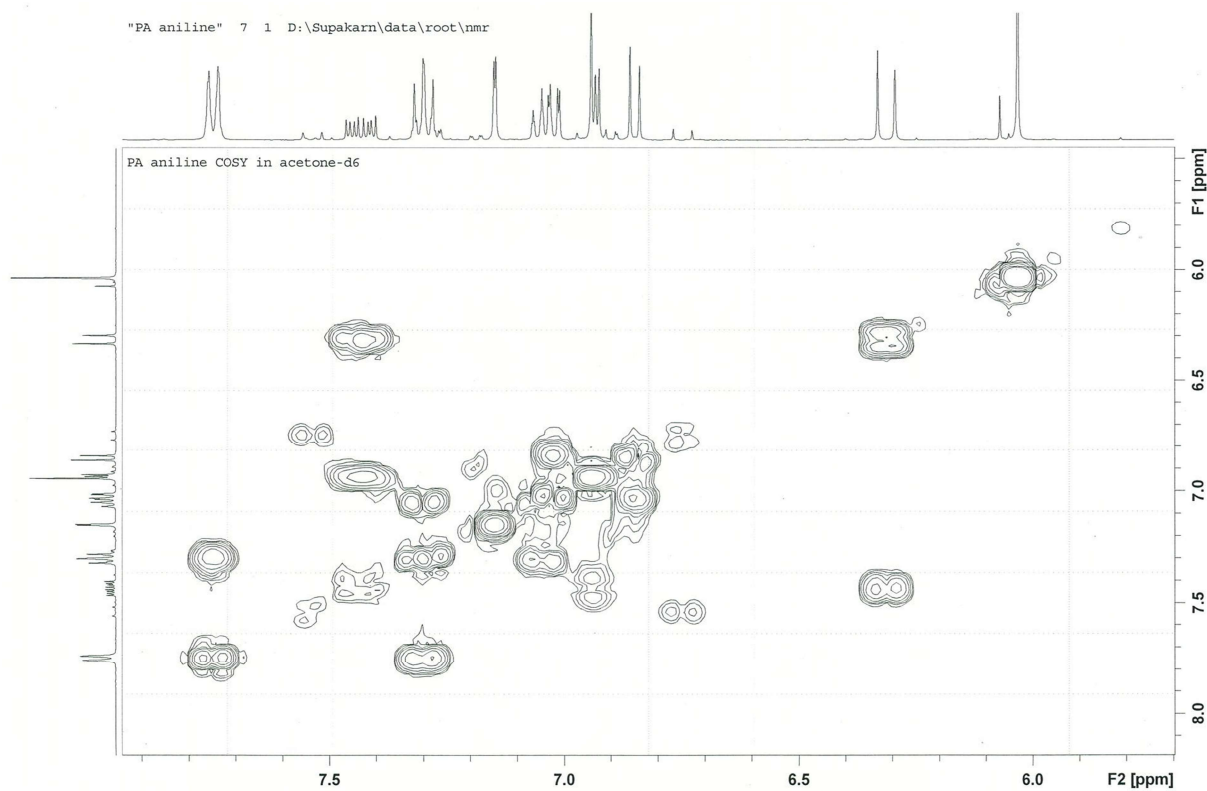

Figure S12. COSY spectrum of compound 3 in acetone-*d*<sub>6</sub>

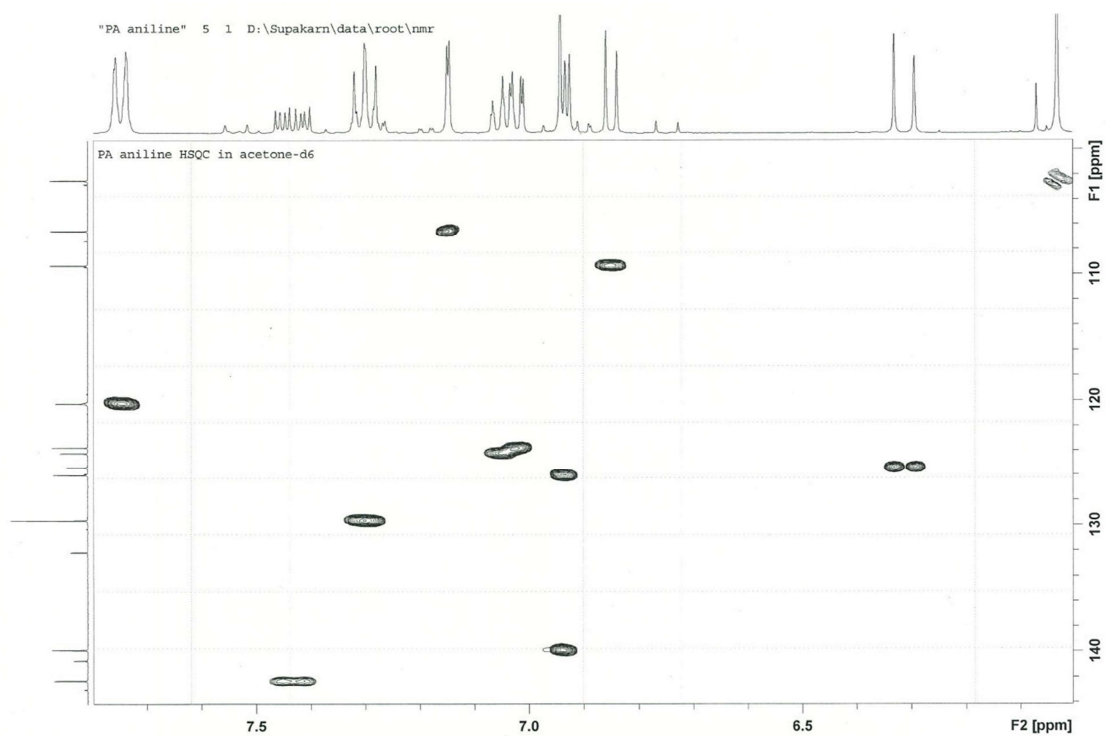

Figure S13. HSQC spectrum of compound 3 in acetone-*d*<sub>6</sub>

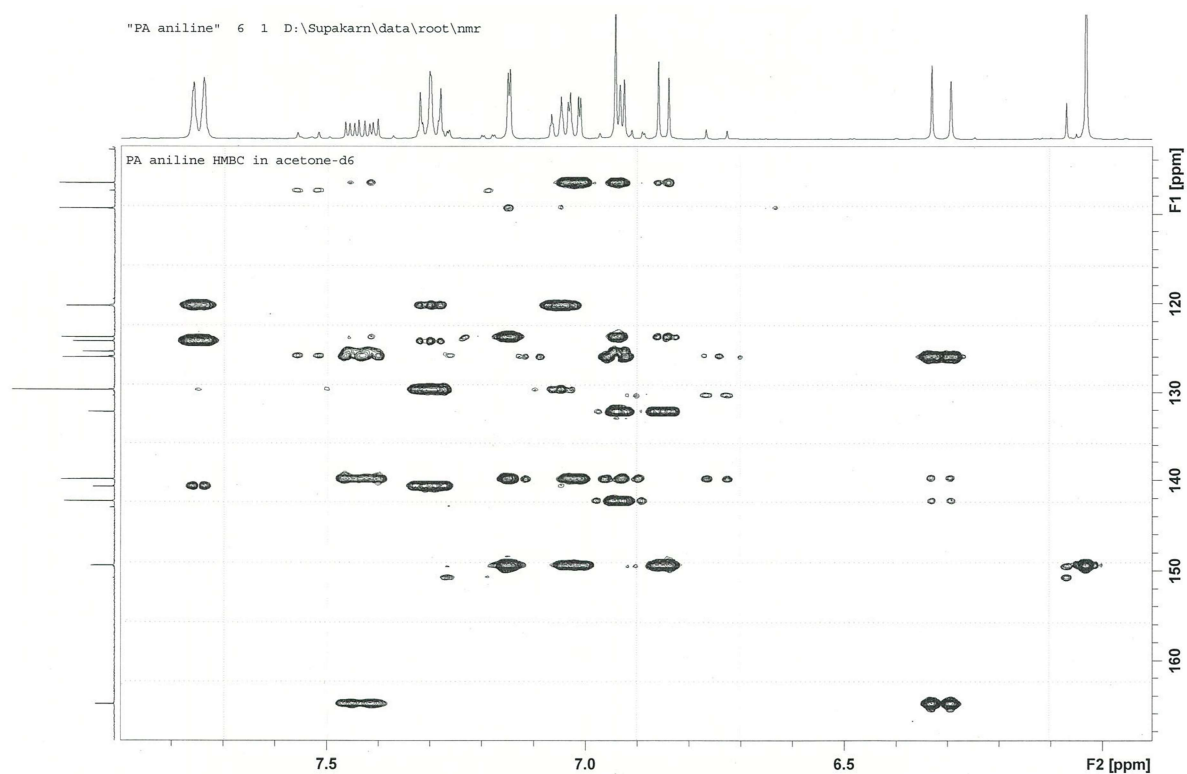

Figure S14. HMBC spectrum of compound 3 in acetone-*d*<sub>6</sub>

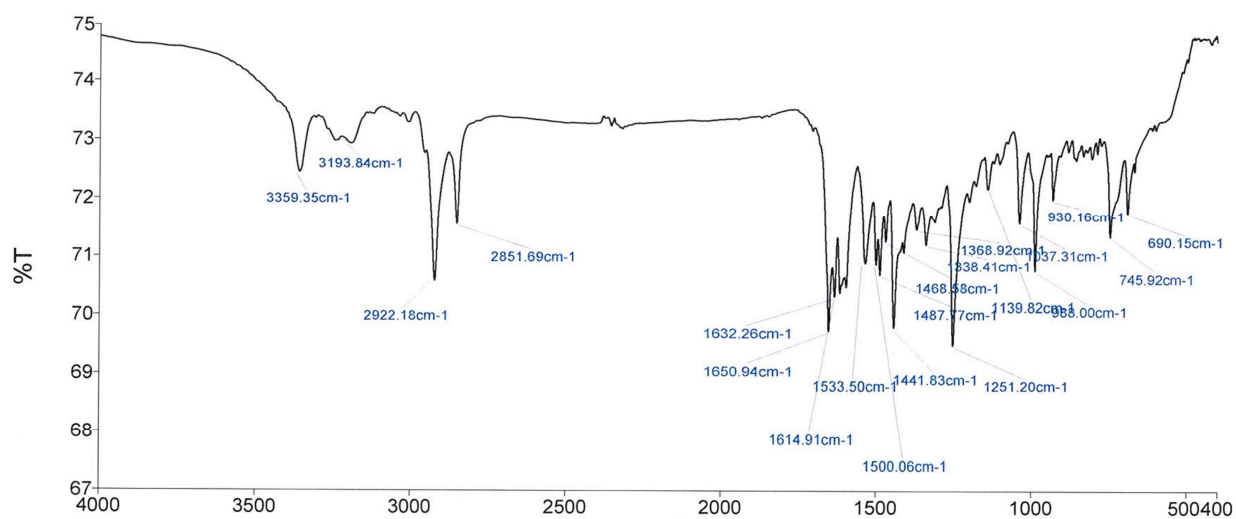

Figure S15. IR spectrum of compound 3, ATR

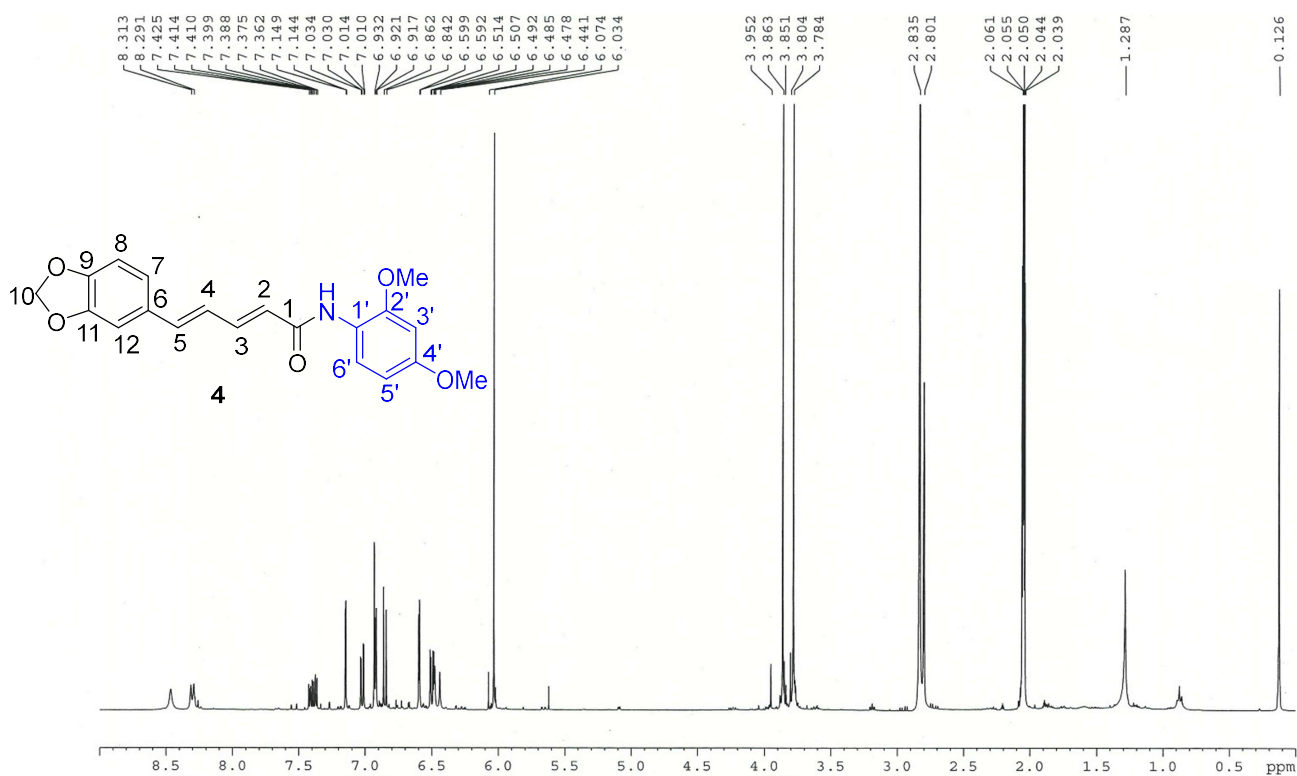

Figure S16. <sup>1</sup>H-NMR spectrum of compound 4 in acetone-*d*<sub>6</sub>

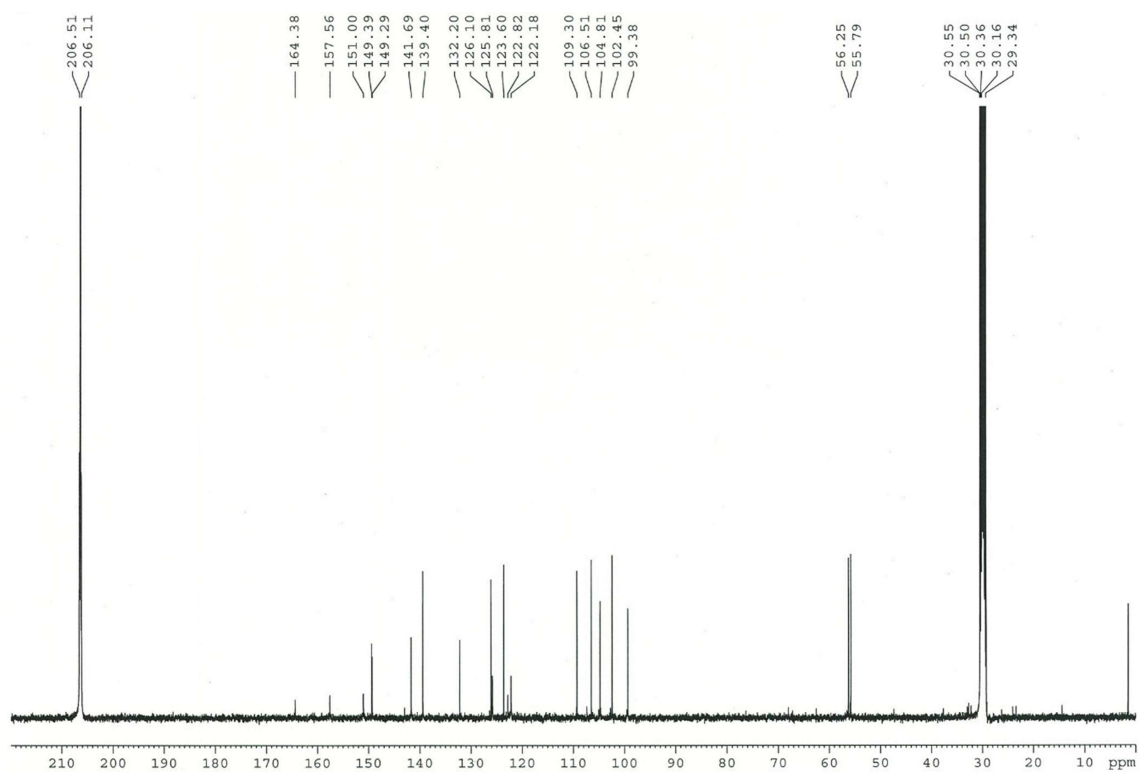

Figure S17. <sup>13</sup>C-NMR spectrum of compound 4 in acetone-*d*<sub>6</sub>

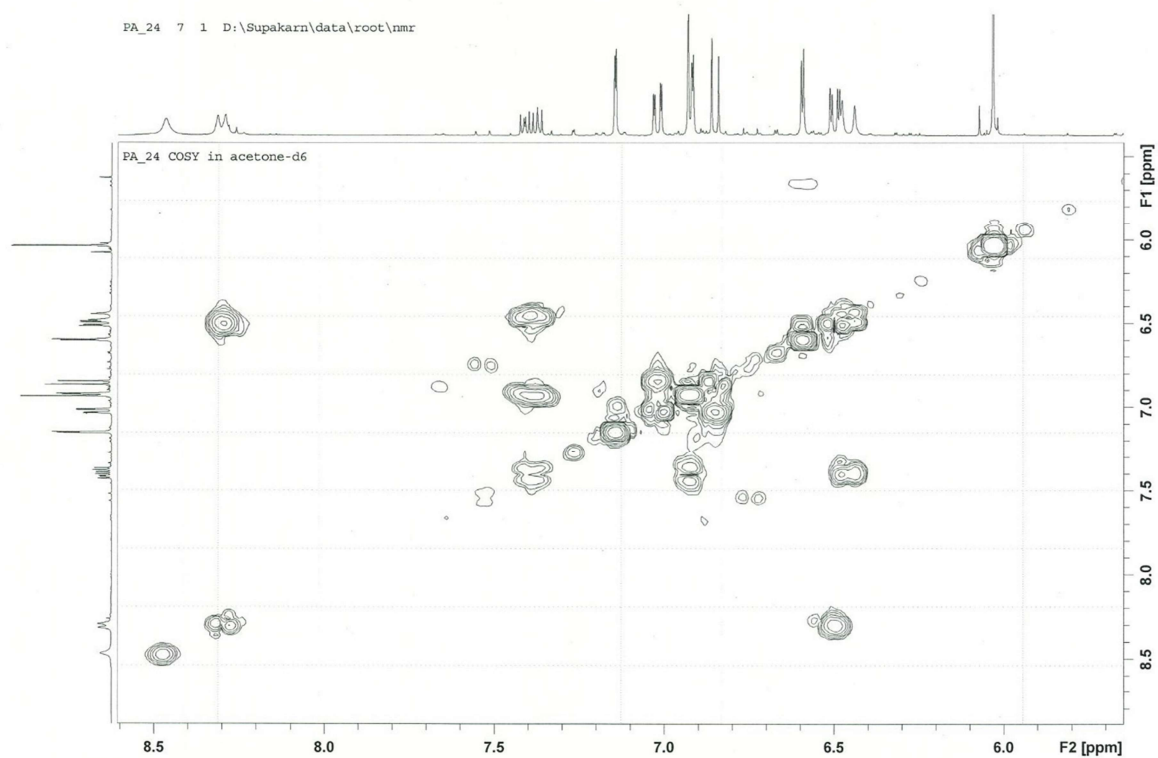

**Figure S18.** COSY spectrum of compound **4** in acetone-*d*<sub>6</sub>

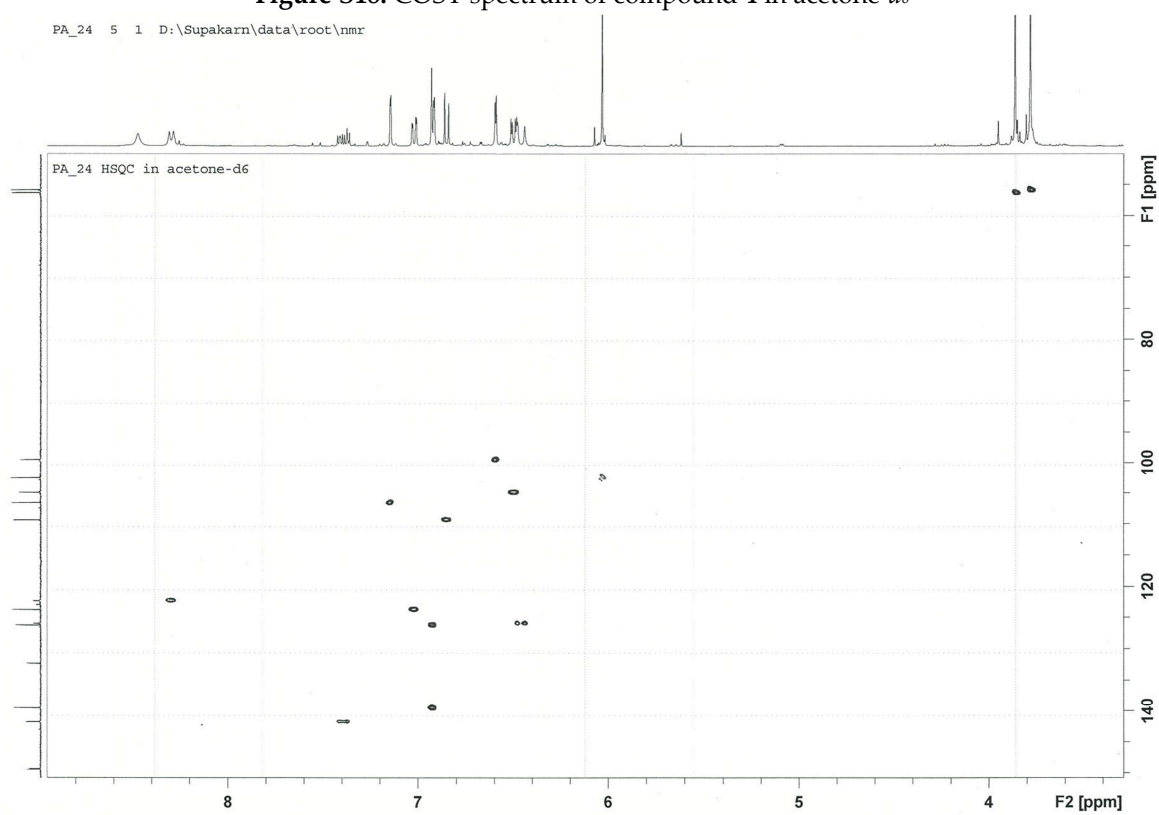

**Figure S19.** HSQC spectrum of compound **3** in acetone-*d*<sub>6</sub>

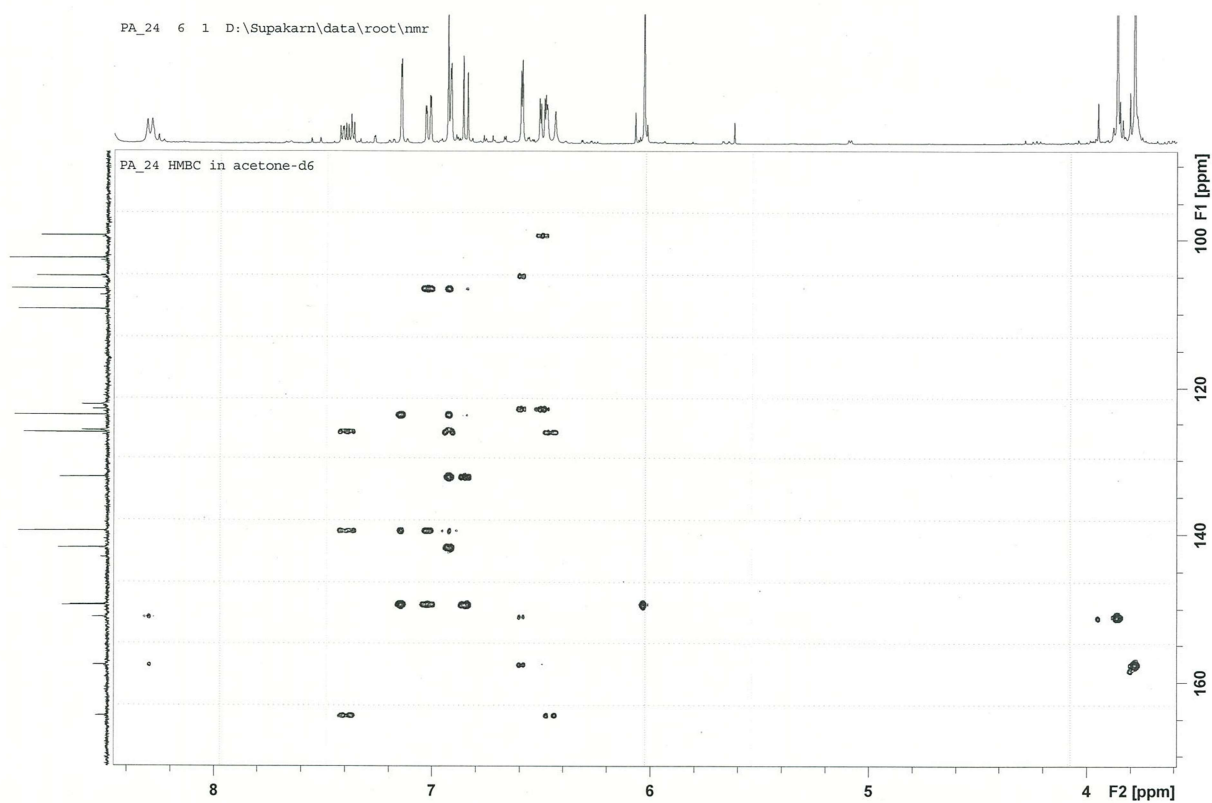

Figure S20. HMBC spectrum of compound 3 in acetone- $d_6$

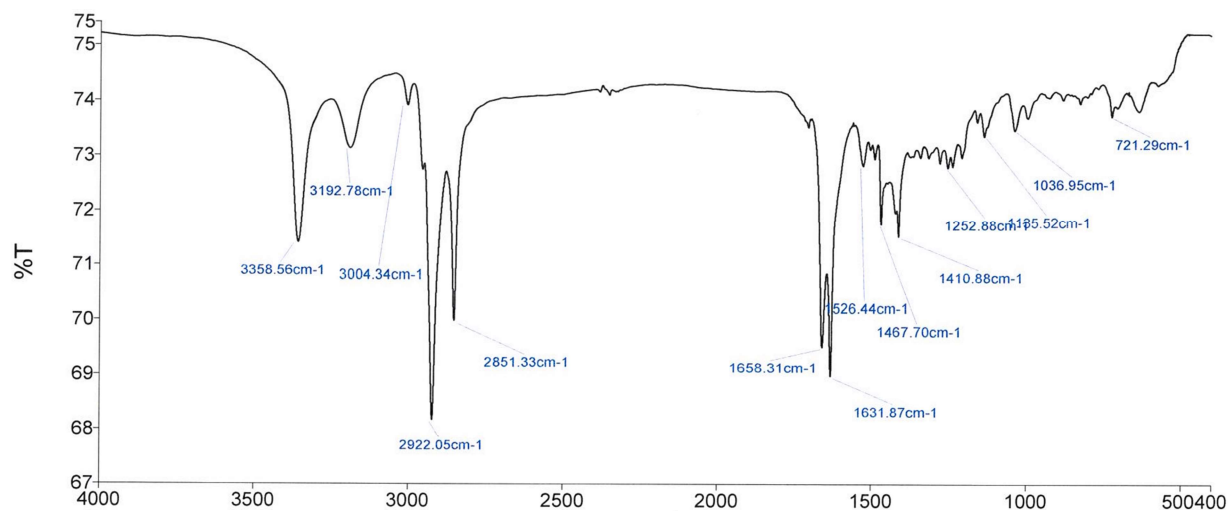

Figure S21. IR spectrum of compound 4, ATR



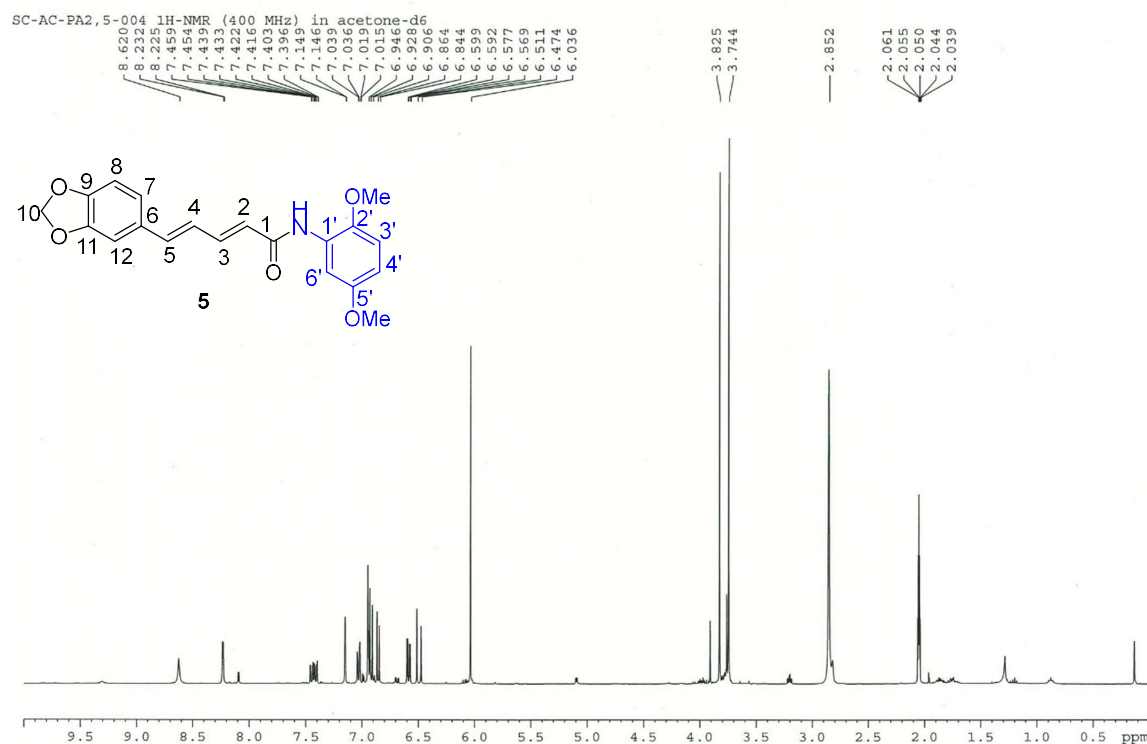

Figure S22. <sup>1</sup>H-NMR spectrum of compound 5 in acetone-*d*<sub>6</sub>

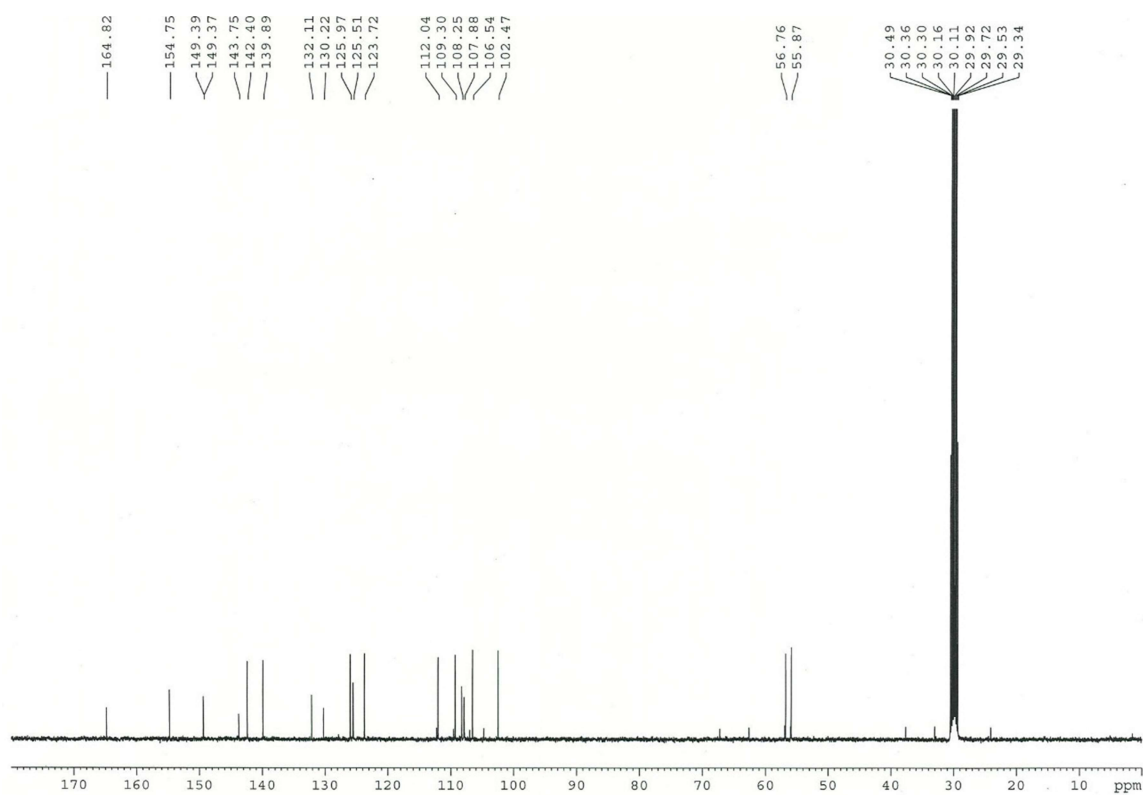

Figure S23. <sup>13</sup>C-NMR spectrum of compound 5 in acetone-*d*<sub>6</sub>



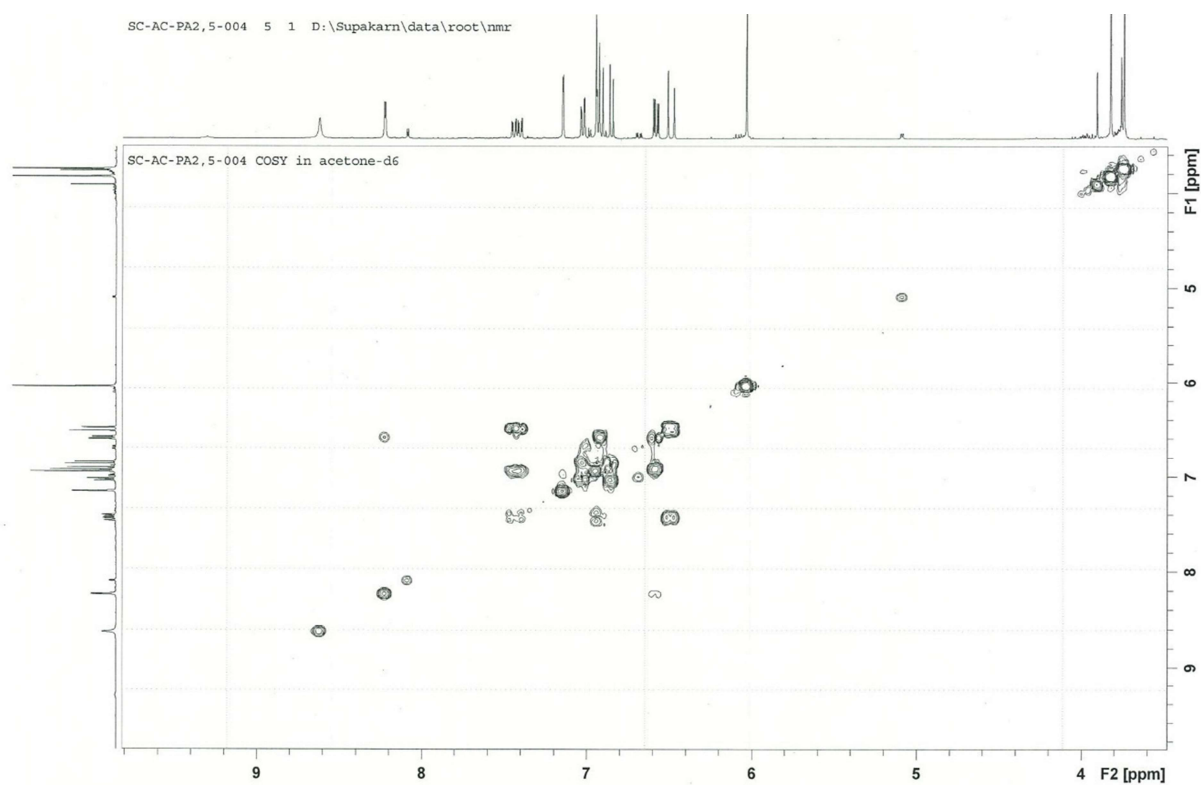

**Figure S24.** COSY spectrum of compound 5 in acetone-*d*<sub>6</sub>

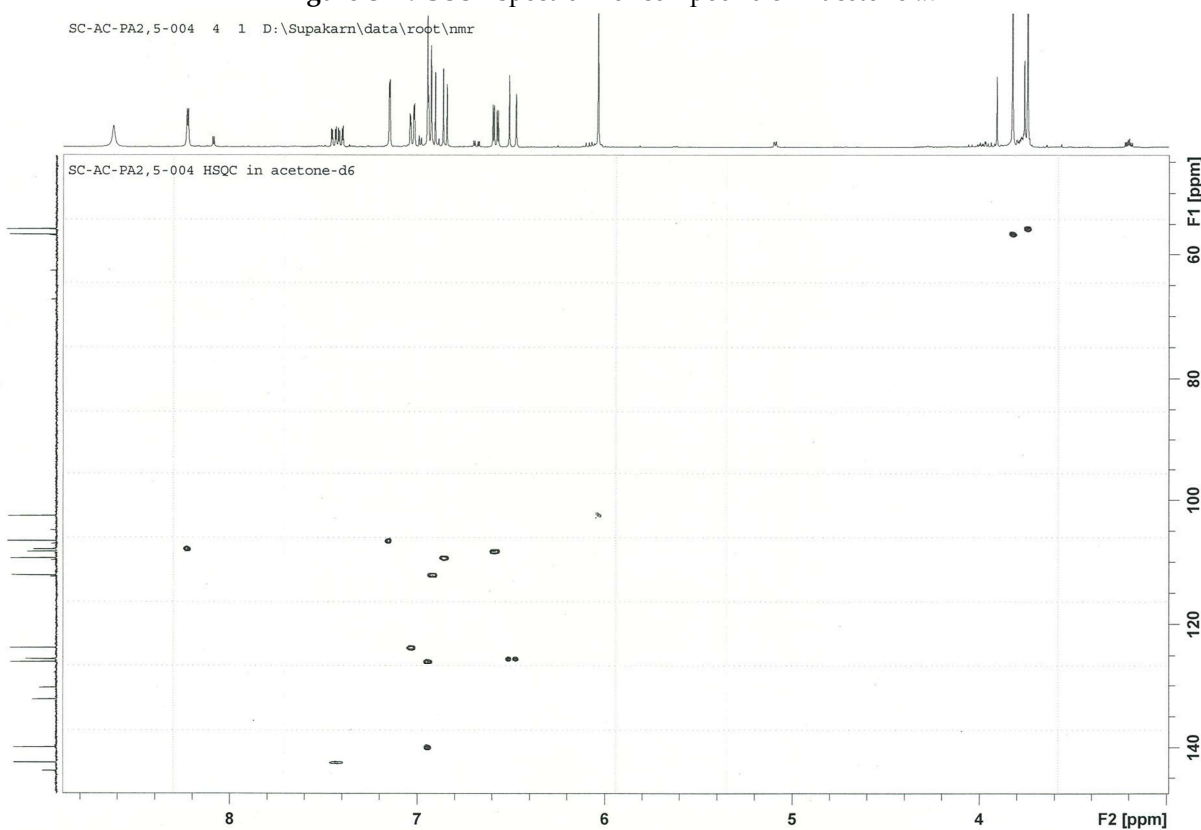

**Figure S25.** HSQC spectrum of compound 5 in acetone-*d*<sub>6</sub>

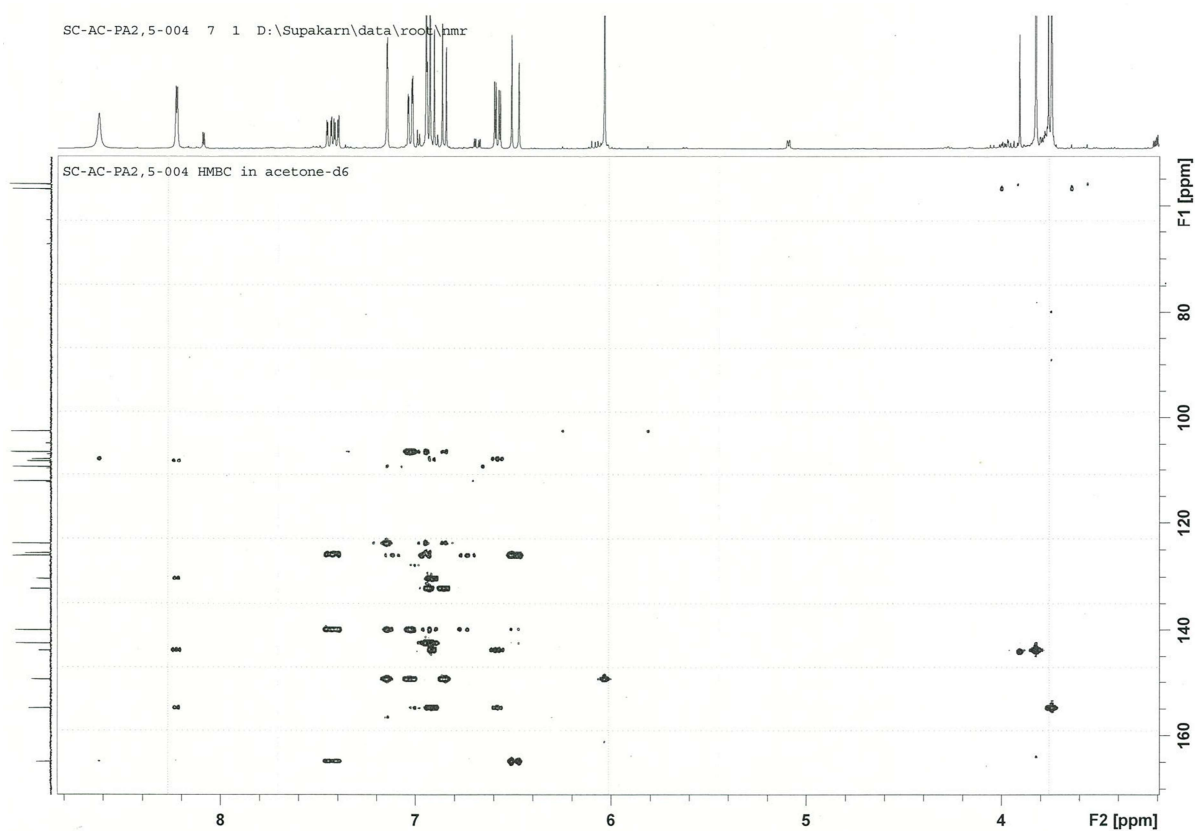

Figure S26. HMBC spectrum of compound **5** in acetone- $d_6$

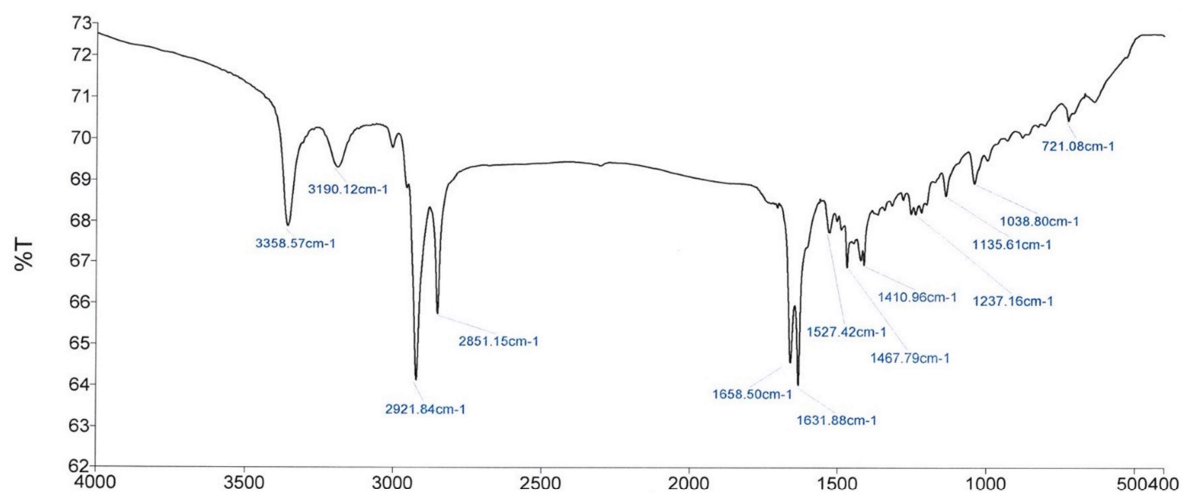

Figure S27. IR spectrum of compound **5**, ATR
